# Supplementary material for: Effective co-delivery of nutlin-3a and p53 genes via core–shell microparticles for disruption of MDM2–p53 interaction and reactivation of p53 in hepatocellular carcinoma
Source: Royal Society of Chemistry journal article supplement (doi:10.1039/c7tb00481h), 2017-01-01
Supplement: c7tb00481h1.pdf [file c7tb00481h1.pdf]

## Supporting Information

### **Effective Co-delivery of Nutlin-3a and p53 genes via Core-shell Microparticles for Disruption of MDM2-p53 Interaction and Reactivation of p53 in Hepatocellular Carcinoma**

*Pooya Davoodi<sup>a</sup>, Madapusi P. Srinivasan<sup>a,b</sup> and Chi-Hwa Wang<sup>\*a</sup>*

*<sup>a</sup> Department of Chemical and Biomolecular Engineering, National University of Singapore, 4  
Engineering Drive 4, Singapore 117585.*

*<sup>b</sup> Civil, Environmental and Chemical Engineering, RMIT University, GPO Box 2476, Melbourne  
VIC 3001 Australia.*

*\*Corresponding author: Tel.: +65-65165079; Fax: +65-67791936, E-mail address:  
chewch@nus.edu.sg*

**Table S1.** Characterization of  $\beta$ -CD-g-CS: degree of substitution

| Sample                 | $\beta$ -CD:CS | Degree of substitution (%) |
|------------------------|----------------|----------------------------|
| $\beta$ -CD-g-CS (1:1) | 0.87           | 4.31                       |
| $\beta$ -CD-g-CS (2:1) | 2.01           | 6.48                       |
| $\beta$ -CD-g-CS (3:1) | 3.02           | 6.99                       |
| $\beta$ -CD-g-CS (6:1) | 5.95           | 8.28                       |

**Table S2.** Drug loading content (DLC) and encapsulation efficiency (EE) of nutlin-3a and p53-pDNA NPs loaded microparticles.

|      | Core compartment |            | Shell compartment* |
|------|------------------|------------|--------------------|
|      | DLC              | EE         | EE                 |
| MPs1 | 3.36±0.29        | 83.95±7.25 | -                  |
| MPs2 | -                | -          | 51.64±6.39         |
| MPs3 | 2.77±0.23        | 69.22±5.81 | 49.21±4.94         |

\* Theoretical loading: 150 µg of pDNA.

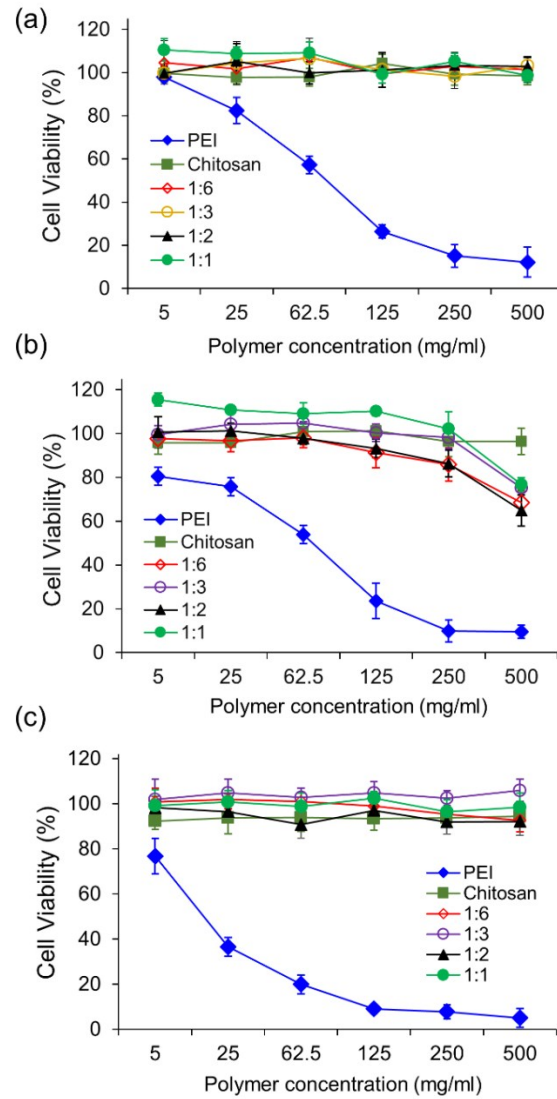

**Figure S1.** Cell viability of  $\beta$ -CD-g-CSs at different  $\beta$ -CD:CS ratios in (a) HepG2 (liver), (b) Hela (ovarian), and (c) C6 glioma (brain) cell lines. PEI-25k and pure CS were considered as controls. The cell viability was determined using MTS assay. Data represent mean  $\pm$  standard deviation of at least n = 4.

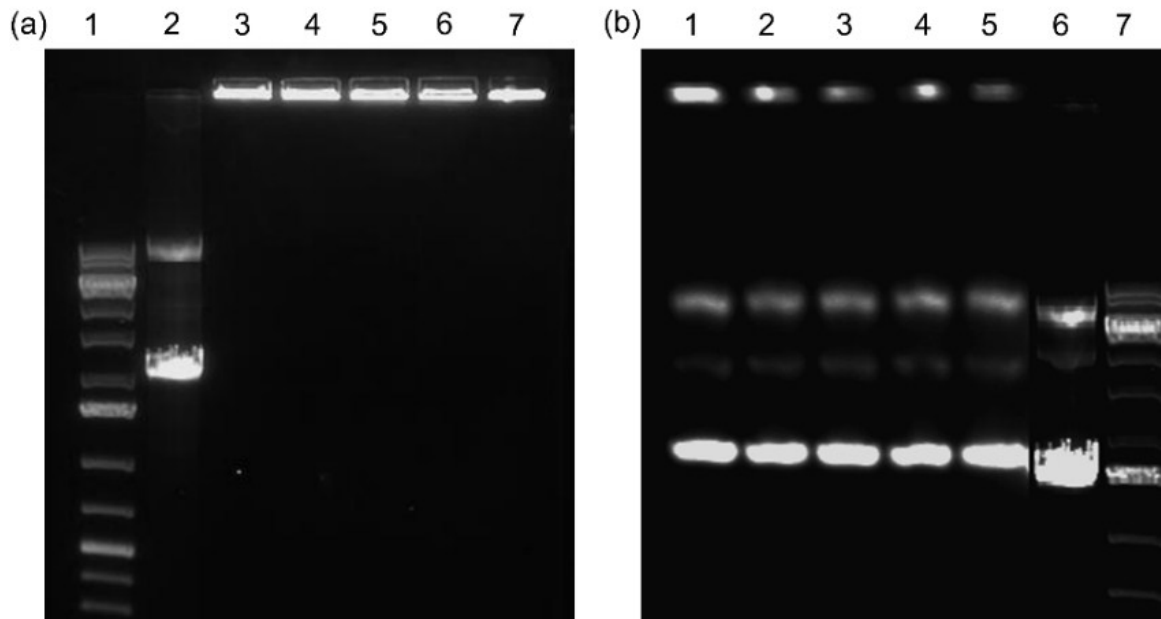

**Figure S2.** Gel retardation assay of pDNA/ $\beta$ -CD-g-CS NPs ( $\beta$ -CD:CS 3:1). (a) The binding efficiency of  $\beta$ -CD-g-CS with pDNA. Lane 1 contains 1 kb DNA ladder. Lane 2 contains 1.0  $\mu$ g of naked DNA. Lanes 3 to 7 contained pDNA-NPs (2.0  $\mu$ g) at N/P ratios of 4, 5, 6, 7, and 8, respectively. (b) The effect of  $\beta$ -CD-g-CS on integrity of pDNA by digesting the nanoparticles with 20  $\mu$ l lysozyme (100 U/ml) and 80  $\mu$ l chitosanase (0.25 U/ml) in 50 mM of acetate buffer (pH=5.5). Lane 1 to 5 contained pDNA-NPs (2.0  $\mu$ g) at N/P ratios of 4, 5, 6, 7 and 8, respectively. Lane 6 contains 1.0  $\mu$ g of naked DNA. Lane 7 contains 1 kb DNA ladder. All samples were electrophorezed in 1 $\times$ TAE on a 1% agarose gel, stained with 1 $\times$  SYBR<sup>®</sup> Gold Nucleic Acid Gel Stain solution, and visualized under an ultraviolet transilluminator and imaged using gel-doc system (G: BOX, Syngene).

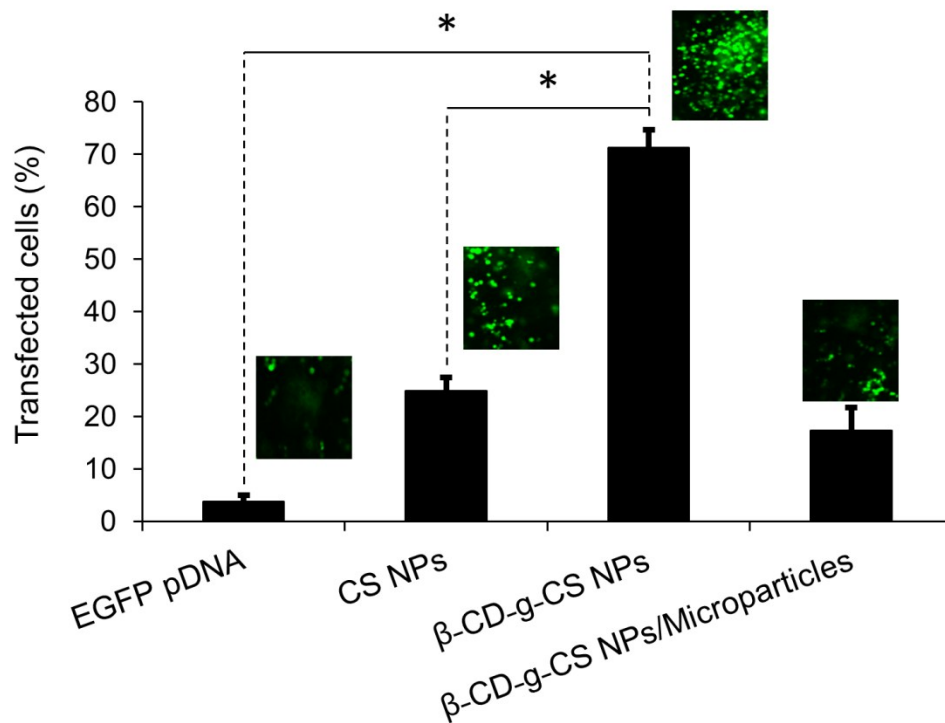

**Figure S3.** Measurement of cell transfection efficiency. Cells were treated by EGFP plasmid DNA, EGFP-pDNA-CS NPs, EGFP-pDNA- $\beta$ -CD-g-CS NPs, and EGFP-pDNA- $\beta$ -CD-g-CS NPs/microparticles encapsulated nanoparticles for 6 h. For microparticle formulation, the cells were incubated with particles for 2 days. Data represent mean  $\pm$  standard deviation of  $n = 3$ .

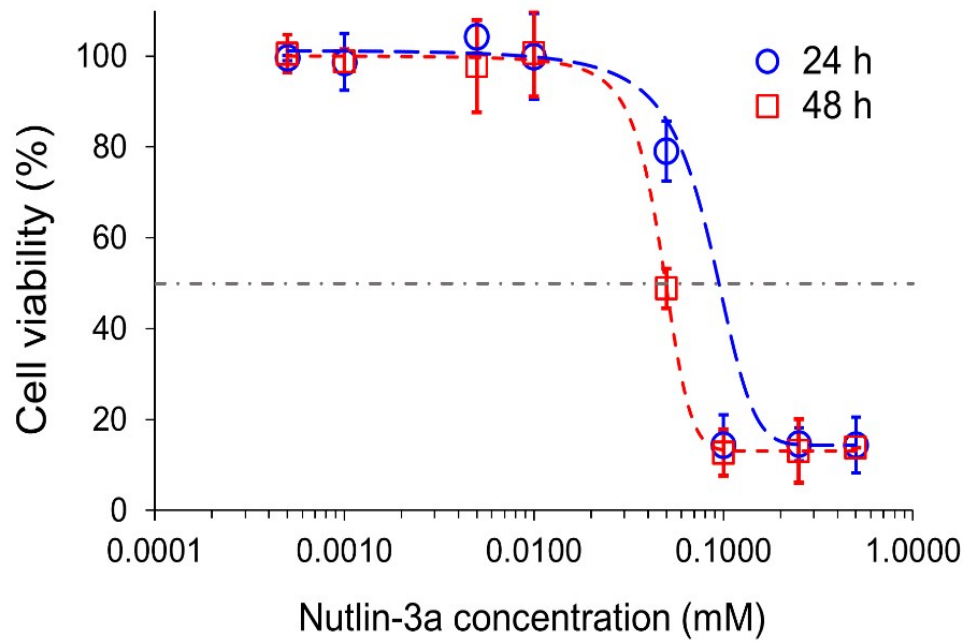

**Figure S4.** Cell viability results at different concentrations of nutlin-3a, where HepG2 cells were treated for 24 h and 48 h. Data represent mean  $\pm$  standard deviation of n=4.

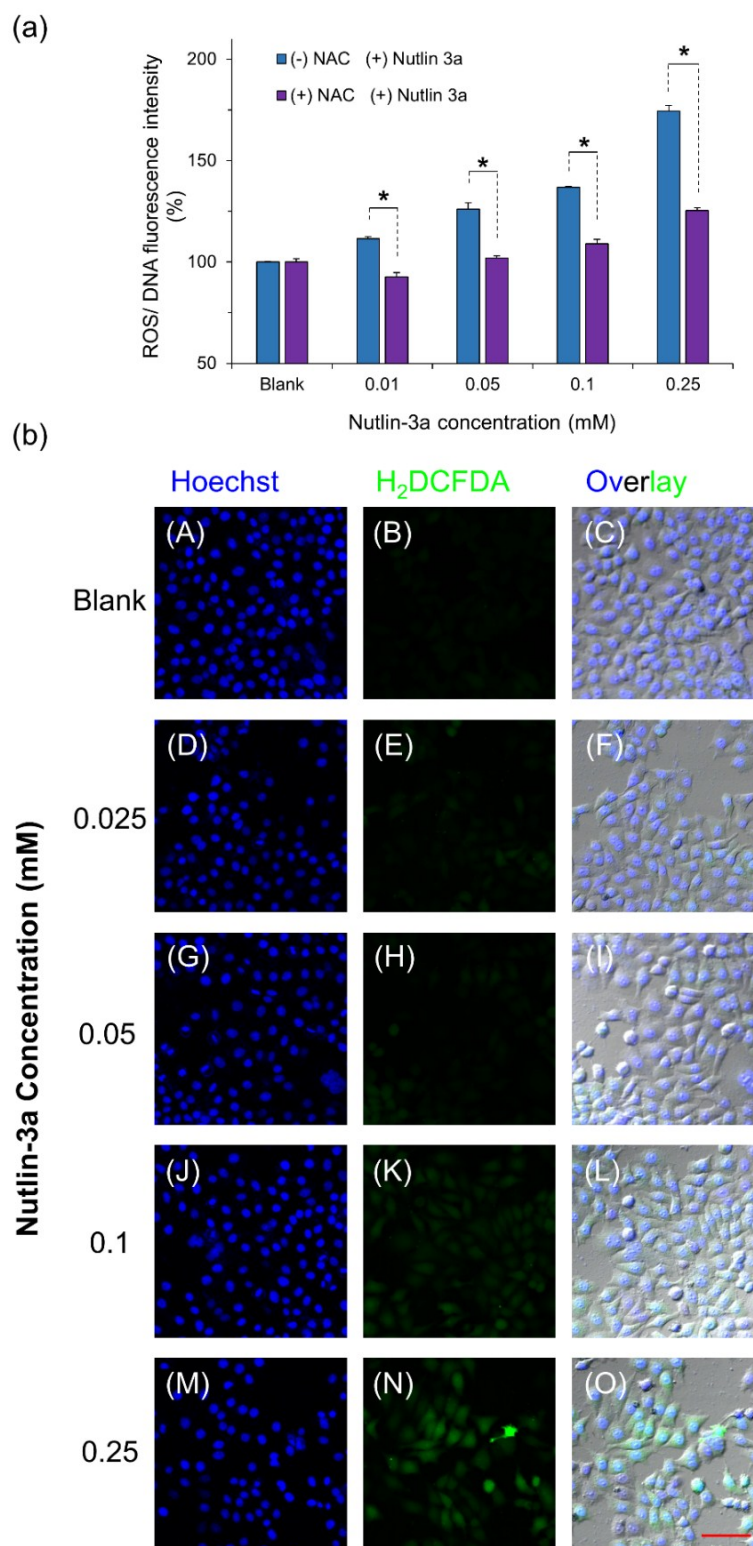

**Figure S5.** (a) Induction of intracellular ROS in non-apoptotic HepG2 cells. Temporal measurement of ROS levels following free-drugs exposure in HepG2 cells. The cells were



exposed to serially diluted nutlin-3a in the presence and absence of N-Acetyl-L-cysteine (NAC, ROS scavenger, Sigma-Aldrich). The ROS levels were measured after 4 h using H<sub>2</sub>DCFDA fluorescent probes. ROS level of non-treated cells at each time-point was considered as negative control. (b) Confocal images depict the increase of intracellular ROS after 4 h of exposure to nutlin-3a solutions. Cell were stained with H<sub>2</sub>DCFDA (ROS fluorescent probe: green light) and cell-permeant nuclear counterstain (Hoechst 33342: blue light). Data represent mean  $\pm$  standard deviation of n=4. Statistical significance: \*  $p < 0.05$ . Scale bar= 25  $\mu$ m.
